# Supplementary material for: Can the Invasive Seaweed Caulerpa cylidracea Represent a New Trophic Resource in the Mediterranean Sea?
Source: MDPI journal article supplement (doi:10.3390/w15112115), 2023-06-02
Supplement: s1 [file s1]

**Table S1.** List of the selected papers analysed in the literature review.

|                                                                                                                                                                                                                                                                                                                                                                                                                                                                            |
|----------------------------------------------------------------------------------------------------------------------------------------------------------------------------------------------------------------------------------------------------------------------------------------------------------------------------------------------------------------------------------------------------------------------------------------------------------------------------|
| Azzurro, E.; Fanelli, E. Preliminary data on feeding habits of dusky spinefoot <i>Siganus luridus</i> in the Sicily Channel (Central Mediterranean). <i>Biologia Marina Mediterranea</i> <b>2004</b> , 11(3):145.                                                                                                                                                                                                                                                          |
| Bariche, M. Diet of the Lessepsian fishes, <i>Siganus rivulatus</i> and <i>S. luridus</i> (Siganidae) in the eastern Mediterranean: A bibliographic analysis. <i>Cybium</i> <b>2006</b> , 30, 41-49. <a href="https://sfi-cybium.fr/sites/default/files/pdfs-cybium/10-Bariche%20275.pdf">https://sfi-cybium.fr/sites/default/files/pdfs-cybium/10-Bariche%20275.pdf</a>                                                                                                   |
| Box, A.; Deudero, S.; Sureda, A.; Blanco, A.; Alos, J.; Terrados, J.; Grau, A.M.; Riera, F. 2009 Diet and physiological responses of <i>Spondyllosoma cantharus</i> (Linnaeus, 1758) to the <i>Caulerpa racemosa</i> var. <i>cylindracea</i> invasion. <i>J. Exp. Mar. Biol. Ecol.</i> <b>2009</b> , 380, 11-19. <a href="http://dx.doi.org/10.1016/j.jembe.2009.08.010">http://dx.doi.org/10.1016/j.jembe.2009.08.010</a>                                                 |
| Bulleri, F.; Tamburello, L.; Benedetti-Cecchi, L. Loss of consumers alters the effects of resident assemblages on the local spread of an introduced macroalga. <i>Oikos</i> <b>2009</b> , 118(2):269-279. <a href="http://dx.doi.org/10.1111/j.1600-0706.2008.16955.x">http://dx.doi.org/10.1111/j.1600-0706.2008.16955.x</a>                                                                                                                                              |
| Casu, D.; Ceccherelli, G.; Sechi, N.; Rumolo, P.; Sara, G. <i>Caulerpa racemosa</i> var. <i>cylindracea</i> as a potential source of organic matter for benthic consumers: evidences from a stable isotope analysis. <i>Aquat. Ecol.</i> <b>2009</b> , 43, 1023-1029. <a href="http://dx.doi.org/10.1007/s10452-008-9223-6">http://dx.doi.org/10.1007/s10452-008-9223-6</a>                                                                                                |
| Cebrian, E.; Ballesteros, E.; Linares, C.; Tomas, F. Do native herbivores provide resistance to Mediterranean marine bioinvasions? A seaweed example. <i>Biol. Invasions</i> <b>2011</b> , 13, 1397-1408. <a href="http://dx.doi.org/10.1007/s10530-010-9898-1">http://dx.doi.org/10.1007/s10530-010-9898-1</a>                                                                                                                                                            |
| De Pascali, S.A.; Del Coco, L.; Fellingine, S.; Mollo, E.; Terlizzi, A.; Fanizzi, F.P. H-1 NMR Spectroscopy and MVA Analysis of <i>Diplodus sargus</i> Eating the Exotic Pest <i>Caulerpa cylindracea</i> . <i>Mar. Drugs</i> <b>2015</b> , 13, 3550-3566. <a href="http://dx.doi.org/10.3390/md13063550">http://dx.doi.org/10.3390/md13063550</a>                                                                                                                         |
| Del Coco, L.; Fellingine, S.; Girelli, C.R.; Angile, F.; Magliozzi, L.; Almada, F.; D'Aniello, B.; Mollo, E.; Terlizzi, A.; Fanizzi, F.P. H-1 NMR Spectroscopy and MVA to Evaluate the Effects of Caulerpin-Based Diet on <i>Diplodus sargus</i> Lipid Profiles. <i>Mar. Drugs</i> <b>2018</b> , 16, -390. <a href="http://dx.doi.org/10.3390/md16100390">http://dx.doi.org/10.3390/md16100390</a>                                                                         |
| Deudero, S.; Box, A.; Alos, J.; Arroyo, N.L.; Marba, N. Functional changes due to invasive species: Food web shifts at shallow <i>Posidonia oceanica</i> seagrass beds colonized by the alien macroalga <i>Caulerpa racemosa</i> . <i>Estuar. Coast. Shelf Sci.</i> <b>2011</b> , 93, 106-116. <a href="http://dx.doi.org/10.1016/j.ecss.2011.03.017">http://dx.doi.org/10.1016/j.ecss.2011.03.017</a>                                                                     |
| Felline, S.; Mollo, E.; Cutignano, A.; Grauso, L.; Andaloro, F.; Castriota, L.; Consoli, P.; Falautano, M.; Sinopoli, M.; Terlizzi, A. Preliminary observations of caulerpin accumulation from the invasive <i>Caulerpa cylindracea</i> in native Mediterranean fish species <i>Aquat. Biology</i> <b>2017</b> , 26, 27-31. <a href="http://dx.doi.org/10.3354/ab00671">http://dx.doi.org/10.3354/ab00671</a>                                                              |
| Felline, S.; Mollo, E.; Ferramosca, A.; Zara, V.; Regoli, F.; Gorbi, S.; Terlizzi, A. Can a marine pest reduce the nutritional value of Mediterranean fish flesh? <i>Mar Biology</i> <b>2014</b> , 161, 1275-1283. <a href="http://dx.doi.org/10.1007/s00227-014-2417-7">http://dx.doi.org/10.1007/s00227-014-2417-7</a>                                                                                                                                                   |
| Felline, S.; Caricato, R.; Cutignano, A.; Gorbi, S.; Lionetto, M.G.; Mollo, E.; Regoli, F.; Terlizzi, A. Subtle Effects of Biological Invasions: Cellular and Physiological Responses of Fish Eating the Exotic Pest <i>Caulerpa racemosa</i> . <i>Plos One</i> <b>2012</b> , 7, -e38763. <a href="http://dx.doi.org/10.1371/journal.pone.0038763">http://dx.doi.org/10.1371/journal.pone.0038763</a>                                                                      |
| Gorbi, S.; Giuliani, M.E.; Pittura, L.; d'Errico, G.; Terlizzi, A.; Fellingine, S.; Grauso, L.; Mollo, E.; Cutignano, A.; Regoli, F. Could molecular effects of <i>Caulerpa racemosa</i> metabolites modulate the impact on fish populations of <i>Diplodus sargus</i> ? <i>Mar. Environ. Res.</i> <b>2014</b> , 96, 2-11. <a href="http://dx.doi.org/10.1016/j.marenvres.2014.01.010">http://dx.doi.org/10.1016/j.marenvres.2014.01.010</a>                               |
| Lundberg, B.; Payiatas, G.; Argyrou, M. Notes on the diet of the Lessepsian migrant herbivorous fishes, <i>Siganus luridus</i> and <i>S. rivulatus</i> , in Cyprus. <i>Israel Journal of Zoology</i> <b>1999</b> , 45, 127-134.                                                                                                                                                                                                                                            |
| Magliozzi, L.; Maselli, V.; Almada, F.; Di Cosmo, A.; Mollo, E.; Polese, G. Effect of the algal alkaloid caulerpin on neuropeptide Y (NPY) expression in the central nervous system (CNS) of <i>Diplodus sargus</i> . <i>J. Comp. Physiol</i> <b>2019</b> , 205, 203-210. <a href="http://dx.doi.org/10.1007/s00359-019-01322-8">http://dx.doi.org/10.1007/s00359-019-01322-8</a>                                                                                          |
| Magliozzi, L.; Almada, F.; Robalo, J.; Mollo, E.; Polese, G.; Goncalves, E.J.; Fellingine, S.; Terlizzi, A.; D'Aniello, B. Cryptic effects of biological invasions: Reduction of the aggressive behaviour of a native fish under the influence of an invasive biomolecule. <i>Plos One</i> <b>2017</b> , 12, -e0185620. <a href="http://dx.doi.org/10.1371/journal.pone.0185620">http://dx.doi.org/10.1371/journal.pone.0185620</a>                                        |
| Marco-Mendez, C.; Ferrero-Vicente, L.M.; Prado, P.; Sanchez-Lizaso, J.L. Epiphytes and nutrient contents influence <i>Sarpa salpa</i> herbivory on <i>Caulerpa</i> spp vs. seagrass species in Mediterranean meadows. <i>Estuar. Coast. Shelf Sci.</i> <b>2017</b> , 184, 54-66. <a href="http://dx.doi.org/10.1016/j.ecss.2016.11.005">http://dx.doi.org/10.1016/j.ecss.2016.11.005</a>                                                                                   |
| Maric, M.; De Troch, M.; Occhipinti-Ambrogi, A.; Olenin, S. Trophic interactions between indigenous and non-indigenous species in Lampedusa Island, Mediterranean Sea. <i>Mar. Environ. Res.</i> <b>2016</b> , 120, 182-190. <a href="http://dx.doi.org/10.1016/j.marenvres.2016.08.005">http://dx.doi.org/10.1016/j.marenvres.2016.08.005</a>                                                                                                                             |
| Miccoli, A.; Mancini, E.; Boschi, M.; Provenza, F.; Lelli, V.; Tiralongo, F.; Renzi, M.; Terlizzi, A.; Bonamano, S.; Marcelli, M. Trophic, Chemo-Ecological and Sex-Specific Insights on the Relation Between <i>Diplodus sargus</i> (Linnaeus, 1758) and the Invasive <i>Caulerpa cylindracea</i> (Sonder, 1845). <i>Front. Mar. Sci.</i> <b>2021</b> , 8, -680787. <a href="http://dx.doi.org/10.3389/fmars.2021.680787">http://dx.doi.org/10.3389/fmars.2021.680787</a> |

|                                                                                                                                                                                                                                                                                                                                                                                                                                                                                                                                                                                |
|--------------------------------------------------------------------------------------------------------------------------------------------------------------------------------------------------------------------------------------------------------------------------------------------------------------------------------------------------------------------------------------------------------------------------------------------------------------------------------------------------------------------------------------------------------------------------------|
| Noe, S.; Badalamenti, F.; Bonaviri, C.; Musco, L.; Fernandez, T.V.; Vizzini, S.; Gianguzza, P. Food selection of a generalist herbivore exposed to native and alien seaweeds. <i>Mar. Pollut. Bull.</i> <b>2018</b> , <i>129</i> , 469-473. <a href="http://dx.doi.org/10.1016/j.marpolbul.2017.10.015">http://dx.doi.org/10.1016/j.marpolbul.2017.10.015</a>                                                                                                                                                                                                                  |
| Pusceddu, A.; Mikhno, M.; Giglioli, A.; Secci, M.; Pasquini, V.; Moccia, D.; Addis, P. Foraging of the sea urchin <i>Paracentrotus lividus</i> (Lamarck, 1816) on invasive allochthonous and autochthonous algae. <i>Mar. Environ. Res.</i> <b>2021</b> , <i>170</i> , -105428. <a href="http://dx.doi.org/10.1016/j.marenvres.2021.105428">http://dx.doi.org/10.1016/j.marenvres.2021.105428</a>                                                                                                                                                                              |
| Ruitton, S.; Verlaque, M.; Aubin, G.; Boudouresque, C.F. Grazing on <i>Caulerpa racemosa</i> var. <i>cyllindracea</i> (Caulerpales, Chlorophyta) in the Mediterranean Sea by herbivorous fishes and sea urchins. <i>Vie Et Milieu-Life &amp; Environment</i> <b>2006</b> , <i>56</i> , 33-41.                                                                                                                                                                                                                                                                                  |
| Santamaria, J.; Tomas, F.; Ballesteros, E.; Cebrian, E. Herbivory on the Invasive Alga <i>Caulerpa cylindracea</i> : The Role of Omnivorous Fishes. <i>Front. Mar. Sci.</i> <b>2021</b> , <i>8</i> , 702492. <a href="http://dx.doi.org/10.3389/fmars.2021.702492">http://dx.doi.org/10.3389/fmars.2021.702492</a>                                                                                                                                                                                                                                                             |
| Santamaría, J.; Golo, R.; Verdura, J.; Tomas, F.; Ballesteros, E.; Alcoverro, T.; Arthur, R.; Cebrian, E. Learning takes time: Biotic resistance by native herbivores increases through the invasion process. <i>Ecol. Letters</i> <b>2022</b> , <i>25</i> (11), 2525-2539. <a href="https://doi.org/10.1111/ele.14115">https://doi.org/10.1111/ele.14115</a>                                                                                                                                                                                                                  |
| Tejada, S.; Deudero, S.; Box, A.; Sureda, A. Physiological response of the sea urchin <i>Paracentrotus lividus</i> fed with the seagrass <i>Posidonia oceanica</i> and the alien algae <i>Caulerpa racemosa</i> and <i>Lophocladia lallemandii</i> . <i>Mar. Environ. Res.</i> <b>2013</b> , <i>83</i> , 48-53. <a href="http://dx.doi.org/10.1016/j.marenvres.2012.10.008">http://dx.doi.org/10.1016/j.marenvres.2012.10.008</a>                                                                                                                                              |
| Terlizzi, A.; Felling, S.; Lionetto, M.G.; Caricato, R.; Perfetti, V.; Cutignano, A.; Mollo, E. Detrimental physiological effects of the invasive alga <i>Caulerpa racemosa</i> on the Mediterranean white seabream <i>Diplodus sargus</i> . <i>Aquat. Biology</i> <b>2011</b> , <i>12</i> , 109-117. <a href="http://dx.doi.org/10.3354/ab00330">http://dx.doi.org/10.3354/ab00330</a>                                                                                                                                                                                        |
| Tomas, F.; Box, A.; Terrados, J. Effects of invasive seaweeds on feeding preference and performance of a keystone Mediterranean herbivore. <i>Biol. Invasions</i> <b>2011a</b> , <i>13</i> , 1559-1570. <a href="http://dx.doi.org/10.1007/s10530-010-9913-6">http://dx.doi.org/10.1007/s10530-010-9913-6</a>                                                                                                                                                                                                                                                                  |
| Tomas, F.; Cebrian, E.; Ballesteros, E. Differential herbivory of invasive algae by native fish in the Mediterranean Sea. <i>Estuar. Coast. Shelf Sci.</i> <b>2011b</b> , <i>92</i> , 27-34. <a href="http://dx.doi.org/10.1016/j.ecss.2010.12.004">http://dx.doi.org/10.1016/j.ecss.2010.12.004</a>                                                                                                                                                                                                                                                                           |
| Turhan, S.; Cava, L. The threat on your plate: Do we just eat <i>Sarpa salpa</i> or more? <i>Reg. Stud. Mar. Sci.</i> <b>2019</b> , <i>29</i> , 100697. <a href="http://dx.doi.org/10.1016/j.rsma.2019.100697">http://dx.doi.org/10.1016/j.rsma.2019.100697</a>                                                                                                                                                                                                                                                                                                                |
| Vazquez-Luis, M.; Sanchez-Jerez, P.; Bayle-Sempere, J.T. Effects of <i>Caulerpa racemosa</i> var. <i>cyllindracea</i> on prey availability: an experimental approach to predation of amphipods by <i>Thalassoma pavo</i> (Labridae). <i>Hydrobiologia</i> <b>2010</b> , <i>654</i> , 147-154. <a href="http://dx.doi.org/10.1007/s10750-010-0378-5">http://dx.doi.org/10.1007/s10750-010-0378-5</a>                                                                                                                                                                            |
| Vega-Fernandez, T.; Badalamenti, F.; Bonaviri, C.; Di Trapani, F.; Gianguzza, P.; Noe, S.; Musco, L. Synergistic reduction of a native key herbivore performance by two non- indigenous invasive algae. <i>Mar. Pollut. Bull.</i> <b>2019</b> , <i>141</i> , 649-654. <a href="http://dx.doi.org/10.1016/j.marpolbul.2019.02.073">http://dx.doi.org/10.1016/j.marpolbul.2019.02.073</a>                                                                                                                                                                                        |
| Vitale, R.M.; D'Aniello, E.; Gorbi, S.; Martella, A.; Silvestri, C.; Giuliani, M.E.; Fellous, T.; Gentile, A.; Carbone, M.; Cutignano, A.; Grauso, L.; Magliozzi, L.; Polese, G.; D'Aniello, B.; Defranoux, F.; Felling, S.; Terlizzi, A.; Calignano, A.; Regoli, F.; Di Marzo, V.; Amodeo, P.; Mollo, E. Fishing for Targets of Alien Metabolites: A Novel Peroxisome Proliferator-Activated Receptor (PPAR) Agonist from a Marine Pest. <i>Mar. Drugs</i> <b>2018</b> , <i>431</i> . <a href="http://dx.doi.org/10.3390/md16110431">http://dx.doi.org/10.3390/md16110431</a> |
| Zuljevic, A.; Nikolic, V.; Despalatovic, M.; Antolic, B. Experimental in situ feeding of the sea urchin <i>Paracentrotus lividus</i> with invasive algae <i>Caulerpa racemosa</i> var. <i>cyllindracea</i> and <i>Caulerpa taxifolia</i> in the Adriatic sea. <i>Fresenius Environ. Bull.</i> <b>2008</b> , <i>17</i> , 2098-2102.                                                                                                                                                                                                                                             |
